# Supplementary material for: Architectural instability, inverted skews and mitochondrial phylogenomics of Isopoda: outgroup choice affects the long-branch attraction artefacts
Source: R Soc Open Sci. 2020 Feb 5;7(2):191887. doi: 10.1098/rsos.191887 (PMC7062073; doi:10.1098/rsos.191887)
Supplement: Datasets, comparative statistics, skews and phylogenetic analyses [file rsos191887supp1.xlsx]

## Sheet: A
Supplementary File. Datasets, comparative statistics, skews and phylogenetic analyses.
Worksheet A: Taxonomy and basic statistics for all available isopod mitogenomes and selected non-isopod Malcostraca outgroups.
Worksheet B: Gene statistics for all available isopod mitogenomes (+ outgroups).
Worksheed C: Phylogenetic analyses.
Worksheed D: Skews and base composition of the mitogenome of A. magnifica.
Taxonomy and basic statistics for all available isopod mitogenomes and selected non-isopod Malcostraca outgroups
Organism	Class	Subclass	Superorder	Order	Suborder	Family	Full length (bp)	A (%)	T (%)	C (%)	G (%)	A+T (%)	G+C (%)	AT skew	GC skew	ID
Asotana magnifica	Malacostraca	Eumalacostraca	Peracarida	Isopoda	Cymothoida	Cymothoidae	14435	38	30.3	22.5	9.1	68.3	31.6	0.111	-0.423	MK790137
Cymothoa indica	Malacostraca	Eumalacostraca	Peracarida	Isopoda	Cymothoida	Cymothoidae	14475	36	27.8	26.1	10.1	63.8	36.2	0.129	-0.442	MH396438.1
Ichthyoxenos japonensis	Malacostraca	Eumalacostraca	Peracarida	Isopoda	Cymothoida	Cymothoidae	15440	37.3	35.4	18.7	8.5	72.7	27.2	0.026	-0.375	MF419233.1
Tachaea chinensis	Malacostraca	Eumalacostraca	Peracarida	Isopoda	Cymothoida	Corallanidae	14616	38.4	34.4	18.5	8.8	72.8	27.3	0.055	-0.354	MF419232.1
Gyge ovalis	Malacostraca	Eumalacostraca	Peracarida	Isopoda	Cymothoida	Bopyridae	14268	27	32.6	17.8	22.6	59.6	40.4	-0.093	0.118	NC_037467.1
Bathynomus sp.	Malacostraca	Eumalacostraca	Peracarida	Isopoda	Cymothoida	Cirolanidae	14965	26.6	32.1	17	24.3	58.7	41.3	-0.093	0.175	KU057374.1
Eurydice pulchra*	Malacostraca	Eumalacostraca	Peracarida	Isopoda	Cymothoida	Cirolanidae	13055	26.5	29.4	17.7	26.4	55.9	44.1	-0.052	0.198	GU130253.1
Asellus aquaticus*	Malacostraca	Eumalacostraca	Peracarida	Isopoda	Asellota	Asellidae	13639	31	30.9	21.3	16.7	61.9	38	0.002	-0.122	GU130252.1
Janira maculosa*	Malacostraca	Eumalacostraca	Peracarida	Isopoda	Asellota	Janiridae	9871	34.2	37	14.8	14	71.2	28.8	-0.04	-0.026	GU130255.1
Sphaeroma serratum*	Malacostraca	Eumalacostraca	Peracarida	Isopoda	Sphaeromatidea	Sphaeromatidae	13467	25.3	29.1	17.8	27.8	54.4	45.6	-0.069	0.219	GU130256.1
Limnoria quadripunctata	Malacostraca	Eumalacostraca	Peracarida	Isopoda	Limnoriidea	Limnoriidae	16515	29.7	36.6	13.6	19.9	66.3	33.5	-0.104	0.188	NC_024054.1
Idotea baltica*	Malacostraca	Eumalacostraca	Peracarida	Isopoda	Valvifera	Idoteidae	14247	28.2	32.8	16.3	22.7	61	39	-0.076	0.163	DQ442915.1
Glyptonotus antarcticus*	Malacostraca	Eumalacostraca	Peracarida	Isopoda	Valvifera	Chaetiliidae	13809	31.6	33.8	16.6	18	65.4	34.6	-0.033	0.038	GU130254.1
Eophreatoicus sp.	Malacostraca	Eumalacostraca	Peracarida	Isopoda	Phreatoicidea	Amphisopidae	14994	31.2	38.4	11.4	19	69.6	30.4	-0.104	0.25	NC_013976.1
Oniscus asellus	Malacostraca	Eumalacostraca	Peracarida	Isopoda	Oniscidea	Oniscidae	13515	32.6	33.1	16.1	18.2	65.7	34.3	-0.007	0.061	KX289581.1
Mongoloniscus sinensis	Malacostraca	Eumalacostraca	Peracarida	Isopoda	Oniscidea	Agnaridae	16018	37.1	38.2	10.7	14	75.3	24.7	-0.014	0.134	NC_039966.1
Ligia oceanica	Malacostraca	Eumalacostraca	Peracarida	Isopoda	Oniscidea	Ligiidae	15289	29.2	31.7	17	22.2	60.9	39.2	-0.041	0.134	NC_008412.1
Armadillidium nasatum*	Malacostraca	Eumalacostraca	Peracarida	Isopoda	Oniscidea	Armadillidiidae	13943	32.6	35.5	13.4	18.4	68.1	31.8	-0.043	0.16	MF187611.1
Armadillidium album*	Malacostraca	Eumalacostraca	Peracarida	Isopoda	Oniscidea	Armadillidiidae	13812	33.3	36.4	12.5	17.7	69.7	30.2	-0.045	0.172	KX289585.1
Armadillidium vulgare*	Malacostraca	Eumalacostraca	Peracarida	Isopoda	Oniscidea	Armadillidiidae	13932	34.2	37.3	11.8	16.7	71.5	28.5	-0.043	0.174	MF187614.1
Armadillidium vulgare	Malacostraca	Eumalacostraca	Peracarida	Isopoda	Oniscidea	Armadillidiidae	12921	33.9	37.5	11.8	16.8	71.4	28.6	-0.05	0.175	GU130251.1
Armadillidium vulgare*	Malacostraca	Eumalacostraca	Peracarida	Isopoda	Oniscidea	Armadillidiidae	13955	34.3	37	11.8	16.9	71.3	28.7	-0.039	0.179	MF187613.1
Armadillidium vulgare	Malacostraca	Eumalacostraca	Peracarida	Isopoda	Oniscidea	Armadillidiidae	13939	34.1	37.1	11.8	17	71.2	28.8	-0.042	0.18	EF643519.3
Trachelipus rathkii*	Malacostraca	Eumalacostraca	Peracarida	Isopoda	Oniscidea	Trachelipodidae	14080	32.7	34.6	13.3	19.3	67.3	32.6	-0.029	0.184	MF187612.1
Trachelipus rathkii	Malacostraca	Eumalacostraca	Peracarida	Isopoda	Oniscidea	Trachelipodidae	14129	32.7	34.7	13.3	19.3	67.4	32.6	-0.029	0.185	KR013001.1
Cylisticus convexus*	Malacostraca	Eumalacostraca	Peracarida	Isopoda	Oniscidea	Cylisticidae	14154	32.7	35.1	12.9	19.2	67.8	32.1	-0.035	0.194	KR013002.1
Porcellio dilatatus petiti	Malacostraca	Eumalacostraca	Peracarida	Isopoda	Oniscidea	Porcellionidae	13343	29.2	33.9	14.4	22.4	63.1	36.8	-0.074	0.219	KX289583.1
Porcellio dilatatus dilatatus*	Malacostraca	Eumalacostraca	Peracarida	Isopoda	Oniscidea	Porcellionidae	14103	30.6	35	13.4	21.1	65.6	34.5	-0.067	0.224	KX289582.1
Porcellionides pruinosus*	Malacostraca	Eumalacostraca	Peracarida	Isopoda	Oniscidea	Porcellionidae	14078	27.5	33	14.9	24.7	60.5	39.6	-0.09	0.248	KX289584.1
outgroups
Eulimnogammarus cyaneus	Malacostraca	Eumalacostraca	Peracarida	Amphipoda	Senticaudata	Eulimnogammaridae	14370	33.1	34.5	20.3	12.1	67.6	32.4	-0.019	-0.251	NC_033360.1
Metacrangonyx repens	Malacostraca	Eumalacostraca	Peracarida	Amphipoda	Senticaudata	Metacrangonyctidae	14355	37.5	39.4	11.7	11.4	76.9	23.1	-0.025	-0.014	NC_019653.1
Typhlatya miravetensis	Malacostraca	Eumalacostraca	Eucarida	Decapoda	Pleocyemata	Atyidae	15865	35.6	30.6	22.5	11.3	66.2	33.8	0.076	-0.332	NC_036335.1
Atergatis floridus	Malacostraca	Eumalacostraca	Eucarida	Decapoda	Pleocyemata	Xanthidae	16180	33.4	35.9	20.3	10.5	69.3	30.8	-0.036	-0.319	NC_037201.1
Penaeus vannamei**	Malacostraca	Eumalacostraca	Eucarida	Decapoda	Dendrobranchiata	Penaeidae	15990	33	34.7	19.2	13.1	67.7	32.3	-0.026	-0.192	NC_009626.1
Euphausia pacifica	Malacostraca	Eumalacostraca	Eucarida	Euphausiacea	N/A	Euphausiidae	16898	36.1	35.9	16	12	72	28	0.004	-0.145	NC_016184.1
Lysiosquillina maculata	Malacostraca	Hoplocarida	Hoplocarida	Stomatopoda	Unipeltata	Lysiosquillidae	16325	32.8	31.1	21.4	14.7	63.9	36.1	0.026	-0.185	NC_007443.1
Squilla mantis	Malacostraca	Hoplocarida	Hoplocarida	Stomatopoda	Unipeltata	Squillidae	15994	35.1	35.1	16.8	13	70.2	29.8	-0.001	-0.13	NC_006081.1
Neomysis japonica	Malacostraca	Eumalacostraca	Peracarida	Mysida	N/A	Mysidae	17652	36.5	38	13.8	11.7	74.5	25.5	-0.021	-0.085	NC_027510.1
Limulus polyphemus	Merostomata	N/A	N/A	Xiphosurida	N/A	Limulidae	14985	37.5	30.1	22.7	9.7	67.6	32.4	0.111	-0.399	NC_003057.1
* putatively incomplete mitogenomes.
** Litopenaeus vannamei in GenBank, but P. vannamei is the accepted name.
Architectural instability, inverted skews, and mitochondrial phylogenomics of Isopoda: outgroup choice affects the long-branch attraction artefacts
Hong Zou, Ivan Jakovlić, Dong Zhang, Cong-Jie Hua, Rong Chen, Wen-Xiang Li, Ming Li, Gui-Tang Wang

## Sheet: B
Gene statistics for all available isopod mitogenomes (+ outgroups). Gene sizes, start and terminal codons. Species are represented by acronyms of their binomial scientific names (see footnote). The new sequence (A. magnifica) and outgroups are shaded
Genus	Asotana	Ichthyoxenos	Cymothoa	Tachaea	Ligia	Idotea	Armadillidium	Armadillidium	Asellus	Eurydice	Glyptonotus	Janira	Sphaeroma	Trachelipus	Cylisticus	Bathynomus	Oniscus	Porcellio	Porcellio	Porcellionides	Armadillidium	Armadillidium	Trachelipus	Armadillidium	Armadillidium	Eophreatoicus	Gyge	Mongoloniscus	Limnoria	Limulus	Squilla	Lysiosquillina	Penaeus	Euphausia	Metacrangonyx	Neomysis	Eulimnogammarus	Typhlatya	Atergatis
Species	A_m	I_j	C_i	T_c	L_o	I_b	A_v_EF643519.3	A_v_GU130251.1	A_aq	E_pu	G_c	J_m	S_s	T_r_KR013001.1	C_c	B_s	O_a	P_d_KX289582.1	P_d_KX289583.1	P_p	A_al	A_n	T_r_MF187612.1	A_v_MF187613.1	A_v_MF187614.1	E_s	G_o	M_s	L_q	L_p	S_m	L_m	P_v	E_pa	M_r	N_j	E_c	T_m	A_f
Length of PCGs (bp)
atp6	667	708	676	666	672	668	672	669	669	672	675	N/A	672	669	675	669	669	669	669	675	675	669	666	669	669	669	672	675	663	675	678	675	675	675	669	672	669	672	672
atp8	153	147	156	159	151	156	201	156	159	153	159	N/A	156	156	156	156	147	165	165	156	183	N/A	N/A	N/A	N/A	162	180	156	156	156	153	159	159	159	159	159	156	159	159
cox1	1536	1536	1542	1533	1539	1533	1534	1534	1536	1539	1536	1531	1534	1536	1536	1539	1536	1536	1536	1536	1536	1536	1536	1533	1536	1537	1540	1536	1596	1536	1534	1539	1534	1539	1542	1536	1534	1533	1534
cox2	678	676	679	676	684	682	678	678	678	682	684	672	681	696	678	678	678	699	699	741	678	678	696	678	681	687	679	672	660	685	688	688	688	688	685	688	682	688	685
cox3	786	748	786	792	787	790	846	792	786	789	786	795	787	784	787	789	804	828	858	828	792	792	780	792	792	785	784	787	807	784	789	792	790	793	789	786	786	789	792
cytb	1126	1111	1125	1128	1134	1003	1152	366	837	303	760	331	769	1137	1119	1206	1028	1143	1159	1203	1146	1125	1116	1125	1152	1125	1113	1107	1155	1132	1137	1137	1136	1137	1137	1143	1137	1137	1135
nad1	921	936	933	909	943	945	N/A	930	915	918	930	N/A	936	915	921	969	876	924	924	882	972	927	915	930	930	933	922	924	912	933	939	942	939	939	924	960	933	942	939
nad2	984	987	1002	1017	1023	982	N/A	1002	978	954	999	960	987	963	999	999	507	1008	N/A	984	1008	1002	996	1002	1002	999	1011	990	978	1017	1000	1002	1000	1002	994	987	982	1005	1008
nad3	351	350	351	351	351	354	357	354	354	348	354	348	349	339	354	342	393	396	393	381	399	358	339	354	357	345	349	316	354	345	354	354	352	354	354	348	354	352	354
nad4	1311	1303	1309	1273	1335	1342	1342	1356	1327	1353	1342	1302	1342	1326	1341	1347	N/A	1395	1395	1356	1341	1356	1341	1356	1356	1339	1330	1344	1324	1338	1341	1341	1341	1338	1318	1323	1309	1335	1335
nad4L	300	300	273	297	291	297	279	279	303	294	288	297	306	246	288	294	276	297	297	279	297	258	246	258	279	300	297	279	303	300	300	300	300	300	291	288	294	300	303
nad5	1692	1690	1698	1687	1665	1664	1680	1680	1695	1710	1721	N/A	1728	1668	1701	1713	N/A	1695	1695	1725	1677	1680	1668	1680	1686	1716	1714	1713	1701	1714	1713	1713	1723	1731	1708	1674	1713	1728	1725
nad6	486	471	480	495	489	498	427	495	480	477	501	492	486	477	486	N/A	396	528	507	588	483	465	477	474	465	496	483	492	510	462	507	520	516	522	498	510	498	516	498
Length of rRNA genes (bp)
rrnL	1079	1074	1074	1113	1234	1216	600	1043	1168	1137	1215	1102	1154	975	979	1181	N/A	N/A	N/A	N/A	N/A	642	675	633	547	1224	1174	1143	1367	1296	1383	1347	1369	1326	1064	1090	979	1374	1290
rrnS	703	800	725	790	850	794	687	826	675	698	745	831	651	807	812	742	324	329	84	332	217	725	725	709	721	784	584	717	740	799	832	856	856	612	688	1194	628	696	821
Putative start codon
atp6	ATG	ATA	ATG	ATA	ATG	ATA	ATG	ATG	ATG	ATG	ATG	N/A	ATG	ATG	GTG	ATG	ATG	ATG	ATG	ATG	ATG	ATG	ATA	ATG	ATG	ATG	ATG	ATG	ATG	ATG	ATG	ATA	ATG	ATG	ATG	ATG	ATG	ATG	ATA
atp8	ATA	ATA	ATA	ATA	GTG	ATG	ATA	GTT	CTG	GTG	TTG	N/A	ATT	ATC	ATC	ATT	ATA	ATT	ATT	ATG	ATA	N/A	N/A	N/A	N/A	TTG	TTG	ATT	ATC	ATT	ATC	ATT	ATC	ATC	GTG	ATG	GTG	ATT	ATG
cox1	ATG	ATG	ATG	ATG	ACG	ACG	ATG	ATG	CAA	ATG	CCA	CAA	ACG	ATG	ATG	ATG	ATG	ATG	ATG	ATG	ATG	ATG	ATG	ATG	ATG	ACG	ATT	ATG	GTG	TTA	ACG	ACG	ACG	ACG	ATT	ATA	ATC	CAA	ATG
cox2	ATC	ATG	ATA	ATA	ATA	GTG	ATA	ATA	ATC	GTG	GTG	ATT	ATA	ATA	ATT	ATT	ATA	ATA	ATA	ATA	ATA	ATT	ATA	ATA	ATA	ATA	GTG	ATC	ATC	ATG	ATG	ATG	ATG	ATA	ATT	ATA	TTG	ATG	ATG
cox3	ATG	ATA	ATG	ATG	ATG	ATG	ATG	ATG	ATG	ATG	ATA	ATG	ATG	ATA	ATG	ATG	ATG	ATG	ATG	ATG	ATG	ATG	ATA	ATG	ATG	ATT	ATG	ATG	ATG	ATG	ATG	ATG	ATG	ATG	ATG	ATA	ATG	ATG	ATG
cytb	ATT	ATG	TTG	ATA	ATA	ATA	ATA	ATA	ATT	ATA	ATA	ATA	ATT	ATT	ATG	ATA	ATA	TTG	ATA	ATA	ATT	ATG	ATA	ATA	ATA	ATT	ATA	ATG	ATG	ATG	ATG	ATG	ATG	ATG	ATG	ATG	ATG	ATG	ATG
nad1	ATT	ATT	ATT	ATA	ATA	GTG	N/A	ATA	ATT	ATT	ATT	N/A	ATA	ATC	ATT	ATG	ATT	ATA	ATA	ATA	ATA	GTG	ATC	ATA	ATA	ATA	ATT	ATA	ATA	TTG	GTG	ATG	ATA	ATA	ATA	ATG	TTG	ATT	ATT
nad2	ATT	ATT	ATT	ATT	ATG	ATT	N/A	ATA	ATT	ATG	ATT	ATA	ATT	GTG	ATA	ATA	ATT	TTG	N/A	ATG	ATT	ATC	ATT	ATA	ATA	ATA	ATT	ATA	ATC	ATC	ATT	ATT	ATT	ATT	ATT	ATA	TTG	ATT	ATT
nad3	ATA	ATC	ATC	ATA	ATT	ATG	ATA	ATA	ATT	ATA	ATA	ATT	GTG	ATT	ATA	ATT	ATT	ATA	ATA	TTG	ATT	ATG	ATT	GTA	AGA	ATT	ATA	ATT	ATA	ATT	ATG	ATG	ATG	ATT	ATT	ATA	ATG	ATT	ATT
nad4	ATG	ATA	ATG	ATG	ATG	ATG	ATG	ATG	ATG	ATT	ATG	ATG	ATG	ATT	ATG	ATG	N/A	ATG	ATG	ATG	ATG	ATG	ATG	ATG	ATG	ATG	ATG	ATG	ATT	ATG	ATG	ATG	ATG	ATG	ATG	ATG	ATG	ATG	ATG
nad4L	ATT	ATT	TGG	ATA	ATA	ATT	ATA	ATA	ATA	ATC	ATT	ATT	ATA	ATA	ATC	ATT	ATA	ATA	ATA	ATA	ATA	ATG	ATA	ATA	ATA	ATC	ATA	ATT	ATA	ATG	ATG	ATG	ATG	ATG	ATG	ATG	ATG	ATG	ATG
nad5	ATA	ATC	ATA	ATA	ATT	ATT	ATA	ATA	ATA	ATT	ATT	N/A	ATT	ATA	TTG	ATA	N/A	TTG	TTG	TTG	ATG	ATA	ATA	ATA	ATA	TTG	ATA	ATT	ATA	TTG	ATA	ATA	ATA	GTG	TTG	ATA	GTG	GTG	ATT
nad6	ATA	ATA	ATA	ATA	ATT	ATT	TTG	ATT	ATA	ATG	ATT	ATA	ATC	ATG	ATG	N/A	ATA	TTG	ATT	ATA	ATA	ATG	ATG	ATA	ATG	TTG	ATA	ATT	ATT	ATC	ATA	ATC	ATT	ATT	ATT	ATA	ATG	ATC	ATT
Putative terminal codon
atp6	T	TAA	T	TAA	TAA	TA	TAA	TAA	TAA	TAA	TAG	N/A	TAA	TAA	TAA	TAA	TAA	TAA	TAA	TAA	TAA	TAA	TAA	TAA	TAA	TAA	TAA	TAA	TAA	TAA	TAA	TAA	TAA	TAA	TAA	TAA	TAA	TAA	TAA
atp8	TAA	TAA	TAA	TAA	T	TAA	TAA	TAA	TAA	TAA	TAA	N/A	TAA	TAA	TAA	TAA	TAA	TAA	TAA	TAA	TAA	N/A	N/A	N/A	N/A	TAA	TAG	TAA	TAA	TAA	TAA	TAA	TAA	TAA	TAA	TAA	TAA	TAA	TAG
cox1	TAA	TAA	TAA	TAG	TAA	TAA	T	T	TAA	TAA	TAA	T	T	TAA	TAA	TAG	TAG	TAG	TAG	TAA	TAA	TAA	TAA	---	TAA	T	T	TAA	TAA	TAA	T	TAA	T	TAA	TAA	TAA	T	TAA	T
cox2	TAA	T	T	T	TAG	T	TAA	TAA	TAA	T	TAA	TAA	TAG	TAG	TAA	TAA	TAA	TAA	TAA	TAG	TAG	TAA	TAG	TAA	TAG	TAA	T	TAA	TAA	T	T	T	T	T	T	T	T	T	T
cox3	TAA	T	TAA	TAA	T	T	TAG	TAA	TAA	TAA	TAG	TAA	T	T	T	TAA	TAA	TAG	TAG	TAA	TAA	TAA	---	TAA	TAA	TA	T	T	TAA	T	TAG	TAA	T	T	TAA	TAG	TAA	TAA	TAA
cytb	T	T	TAG	TAA	TAA	C	TAA	---	---	---	C	G	T	TAA	TAG	TAA	AC	TAA	A	TAG	TAA	TAA	TAA	TAA	TAA	TAA	TAA	TAA	TAG	T	TAA	TAA	TA	TAA	TAA	TAA	TAA	TAA	T
nad1	TAA	TAA	TAA	TAA	T	TAA	N/A	TAA	TAA	TAA	TAG	N/A	TAA	TAA	TAA	TAA	TAA	TAG	TAG	TAG	TAA	TAA	TAA	TAA	TAA	TAA	T	TAA	TAA	TAA	TAA	TAA	TAA	TAA	TAA	TAA	TAA	TAA	TAA
nad2	TAA	TAA	TAG	TAA	TAA	T	N/A	TAA	TAA	TAA	TAG	TAA	TAG	TAA	TAG	TAG	TAA	TAG	N/A	TAG	TAA	TAA	TAA	TAA	TAA	TAG	TAA	TAG	TAA	TAA	T	TAA	T	TAA	T	TAA	T	TAA	TAA
nad3	TAA	TA	TAA	TAA	TAA	TAA	TAA	TAA	TAA	TAG	TAA	TAA	T	TAG	TAA	TAG	TAG	TAG	TAG	TAA	TAA	T	TAG	TAA	TAA	TAA	T	T	TAA	TAA	TAA	TAA	T	TAA	TAG	TAA	TAG	T	TAA
nad4	TAG	T	T	T	TAA	T	T	TAA	T	TAA	T	TAA	T	TAA	TAA	TAA	N/A	TAA	TAA	TAA	TAG	TAA	TAA	TAA	TAA	T	T	TAA	T	TAG	TAG	TAA	TAA	TAA	T	TAA	T	TAA	TAG
nad4L	TAA	TAA	TAA	TAA	TAA	TAA	TAA	TAA	TAA	TAG	TAA	TAA	TAA	TAA	TAA	TAA	TAA	TAA	TAA	TAA	TAA	TAA	TAA	TAA	TAA	TAA	TAA	TAA	TAA	TAG	TAA	TAA	TAA	TAA	TAA	TAG	TAA	TAA	TAA
nad5	TAA	T	TAA	T	TAG	TA	TAA	TAA	TAG	TAG	TA	N/A	TAG	TAA	TAA	TAA	N/A	TAA	TAA	TAG	TAG	TAA	TAA	TAA	TAA	TAG	T	TAA	TAA	T	TAA	TAA	T	TAA	T	TAA	TAA	TAG	TAA
nad6	TAA	TAA	TAA	TAG	TAG	TAG	T	TAA	TAA	TAA	TAG	TAA	TAG	TAA	TAA	N/A	TAG	TAA	TAA	TAA	TAA	TAG	TAA	TAA	TAA	T	TAG	TAA	TAA	TAA	TAA	T	TAA	TAA	TAA	TAA	TAA	TAA	TAA
AT skew
atp6	0.016	-0.078	0.032	-0.055	-0.148	-0.227	-0.108	-0.112	-0.145	-0.233	-0.159	N/A	-0.189	-0.168	-0.137	-0.173	-0.082	-0.199	-0.176	-0.187	-0.14	-0.181	-0.169	-0.12	-0.115	-0.249	-0.212	-0.134	-0.159	-0.029	-0.17	-0.089	-0.126	-0.119	-0.191	-0.018	-0.14	-0.107	-0.16
atp8	-0.009	0	0.151	-0.05	-0.173	-0.125	-0.094	-0.171	-0.067	-0.258	0.043	N/A	0.015	0.009	-0.028	-0.099	-0.051	0.009	0.018	-0.042	-0.05	N/A	N/A	N/A	N/A	-0.233	-0.204	-0.072	0.111	0.097	0.033	0	0.058	0.008	-0.008	-0.048	-0.043	0.009	-0.121
cox1	-0.009	-0.138	0.007	-0.093	-0.195	-0.222	-0.185	-0.193	-0.14	-0.244	-0.206	-0.173	-0.218	-0.21	-0.191	-0.21	-0.181	-0.222	-0.235	-0.23	-0.224	-0.221	-0.21	-0.187	-0.184	-0.015	-0.223	-0.182	-0.213	-0.044	-0.163	-0.089	-0.128	-0.136	-0.237	-0.072	-0.176	-0.053	-0.148
cox2	0.115	-0.006	0.106	0.024	-0.141	-0.201	-0.109	-0.107	-0.068	-0.188	-0.107	-0.083	-0.146	-0.148	-0.1	-0.15	-0.038	-0.147	-0.149	-0.115	-0.082	-0.103	-0.148	-0.117	-0.106	-0.203	-0.167	-0.076	-0.2	0.036	-0.071	-0.076	-0.055	-0.068	-0.138	0.019	-0.076	0	-0.094
cox3	-0.01	-0.163	-0.009	-0.077	-0.211	-0.238	-0.198	-0.229	-0.171	-0.214	-0.28	-0.201	-0.278	-0.233	-0.282	-0.217	-0.186	-0.23	-0.242	-0.229	-0.268	-0.251	-0.232	-0.22	-0.208	-0.299	-0.196	-0.207	-0.323	-0.073	-0.137	-0.106	-0.144	-0.12	-0.211	-0.024	-0.163	-0.058	-0.174
cytb	-0.326	-0.282	-0.397	-0.328	-0.163	-0.147	-0.093	-0.118	-0.213	-0.18	-0.244	-0.182	-0.141	-0.126	-0.096	-0.125	-0.149	-0.051	-0.068	-0.061	-0.12	-0.121	-0.132	-0.104	-0.098	-0.008	-0.071	-0.169	-0.347	-0.081	-0.197	-0.114	-0.214	-0.16	-0.09	-0.077	-0.133	-0.073	-0.186
nad1	-0.346	-0.183	-0.278	-0.304	-0.194	-0.187	N/A	-0.165	-0.29	-0.198	-0.227	N/A	-0.247	-0.244	-0.221	-0.222	-0.211	-0.174	-0.19	-0.119	-0.163	-0.16	-0.244	-0.171	-0.169	-0.025	-0.157	-0.181	-0.07	-0.388	-0.241	-0.299	-0.216	-0.218	-0.148	-0.138	-0.12	-0.375	-0.203
nad2	-0.047	-0.156	0.01	-0.066	-0.127	-0.249	N/A	-0.155	-0.083	-0.182	-0.188	-0.19	-0.264	-0.213	-0.108	-0.219	-0.083	-0.184	N/A	-0.232	-0.159	-0.134	-0.222	-0.147	-0.152	-0.021	-0.165	-0.072	-0.283	-0.052	-0.177	-0.13	-0.164	-0.112	-0.242	-0.101	-0.149	-0.033	-0.203
nad3	0.02	-0.079	0	-0.062	-0.185	-0.18	-0.231	-0.22	-0.143	-0.196	-0.167	-0.216	-0.286	-0.237	-0.172	-0.285	-0.062	-0.227	-0.265	-0.189	-0.124	-0.203	-0.237	-0.217	-0.216	-0.347	-0.216	-0.168	-0.153	-0.042	-0.213	-0.06	-0.178	-0.161	-0.187	-0.062	-0.172	-0.148	-0.214
nad4	-0.313	-0.251	-0.344	-0.248	-0.134	-0.183	-0.143	-0.147	-0.231	-0.219	-0.245	-0.178	-0.15	-0.226	-0.17	-0.153	N/A	-0.143	-0.159	-0.109	-0.186	-0.127	-0.222	-0.14	-0.144	0.016	-0.134	-0.198	-0.28	-0.374	-0.259	-0.263	-0.175	-0.23	-0.184	-0.062	-0.177	-0.293	-0.2
nad4L	-0.342	-0.279	-0.436	-0.31	-0.196	-0.101	-0.235	-0.259	-0.215	-0.309	-0.224	-0.112	-0.137	-0.209	-0.2	-0.217	-0.166	-0.146	-0.13	-0.129	-0.197	-0.312	-0.209	-0.256	-0.25	0.009	-0.101	-0.15	-0.308	-0.217	-0.184	-0.279	-0.211	-0.283	-0.162	-0.263	-0.163	-0.366	-0.19
nad5	0.053	-0.034	0.039	-0.085	-0.113	-0.214	-0.143	-0.143	-0.18	-0.104	-0.159	N/A	-0.189	-0.101	-0.124	-0.233	N/A	-0.166	-0.194	-0.213	-0.116	-0.132	-0.101	-0.134	-0.139	-0.272	-0.261	-0.119	-0.035	-0.319	-0.199	-0.188	-0.184	-0.191	-0.12	-0.045	-0.092	-0.288	-0.15
nad6	0.02	-0.065	-0.085	0.028	-0.166	-0.21	-0.177	-0.187	-0.135	-0.202	-0.169	-0.191	-0.24	-0.165	-0.174	N/A	-0.075	-0.219	-0.236	-0.229	-0.158	-0.166	-0.165	-0.166	-0.165	-0.343	-0.305	-0.18	-0.184	-0.006	-0.147	-0.119	-0.289	-0.23	-0.243	-0.018	-0.211	-0.053	-0.309
rRNAs	0.005	0.02	0.025	0.005	0.066	0.011	0.039	0.026	0.053	0.026	0.052	0.055	0.028	-0.007	0.017	0.053	0.014	0.015	0	0.01	0.043	0.026	0.002	0.024	0.047	0.071	-0.079	0.025	0.081	-0.147	0.003	0.051	0.047	0.035	-0.022	-0.047	-0.095	-0.069	0.052
rrnL	-0.087	-0.059	-0.101	-0.035	0.06	0.021	0.019	0.007	0.008	0.022	0.037	0.018	-0.007	-0.024	0.008	0.078	N/A	N/A	N/A	N/A	N/A	-0.009	-0.01	-0.02	0.059	0.167	-0.153	0.009	0.091	-0.148	-0.038	0.05	0.043	0.025	-0.001	-0.019	-0.078	-0.083	0.071
rrnS	0.145	0.127	0.214	0.061	0.076	-0.007	0.058	0.052	0.128	0.034	0.08	0.115	0.117	0.017	0.031	0.011	0.014	0.015	0	0.01	0.043	0.06	0.015	0.066	0.037	-0.082	0.085	0.055	0.062	-0.145	0.077	0.054	0.054	0.058	-0.053	-0.074	-0.125	-0.039	0.023
tRNAs	-0.014	-0.007	0.016	0.031	-0.013	-0.004	0.004	0.013	0.045	-0.007	0.003	-0.051	-0.01	0.073	0.008	-0.019	0.011	0.011	0.043	0.035	0.007	0.012	0.007	-0.026	-0.004	-0.012	-0.003	-0.007	0.034	0.031	0.011	0.02	0.028	0.009	0.056	0.02	0.029	-0.006	0.024
GC skew
atp6	-0.482	-0.459	-0.506	-0.485	0.038	0.012	0.2	0.184	-0.162	0.218	-0.058	N/A	0.249	0.171	0.207	0.045	-0.083	0.231	0.157	0.09	0.19	0.161	0.167	0.212	0.184	0.281	0.041	0.136	-0.272	-0.526	-0.183	-0.3	-0.212	-0.133	0.027	-0.202	-0.362	-0.287	-0.29
atp8	-0.619	-0.379	-0.68	-0.744	-0.021	0.1	0.238	0.152	-0.391	0.188	0.045	N/A	0.303	0.22	0.106	0.077	-0.125	0.28	0.216	0.167	0.19	N/A	N/A	N/A	N/A	0.238	-0.194	-0.097	-0.436	-0.721	-0.515	-0.289	-0.526	-0.4	0.286	-0.486	-0.317	-0.619	-0.535
cox1	-0.2	-0.155	-0.269	-0.136	0.083	0.122	0.094	0.109	-0.148	0.184	0.063	0.024	0.131	0.165	0.142	0.15	0.059	0.14	0.14	0.103	0.114	0.105	0.165	0.097	0.087	-0.091	0.093	0.084	0.157	-0.21	0.027	-0.074	-0.071	-0.027	0.181	-0.087	-0.049	-0.223	-0.149
cox2	-0.324	-0.304	-0.468	-0.386	0.11	0.169	0.128	0.105	-0.188	0.168	-0.11	-0.038	0.127	0.21	0.141	0.077	0.048	0.148	0.078	0.184	0.11	0.078	0.21	0.11	0.1	0.183	0.193	0.059	0.224	-0.331	0.014	-0.067	-0.081	-0.037	0.105	-0.052	-0.161	-0.239	-0.213
cox3	-0.279	-0.09	-0.333	-0.259	0.048	0.03	0.041	0.04	-0.106	0.163	0.012	0.051	0.072	0.101	0.034	0.059	0.044	0.142	0.12	0.038	0.068	0.063	0.105	0.007	0.023	0.283	0.109	0.045	0.212	-0.333	-0.026	-0.069	-0.098	-0.061	0.077	-0.004	-0.15	-0.215	-0.181
cytb	0.414	0.454	0.431	0.329	-0.235	-0.212	-0.246	-0.107	0.065	-0.04	-0.031	0.171	-0.23	-0.214	-0.226	-0.282	-0.118	-0.29	-0.304	-0.296	-0.199	-0.145	-0.208	-0.236	-0.208	-0.295	-0.227	-0.162	0.155	-0.427	0.002	-0.13	-0.187	-0.089	-0.217	-0.155	-0.207	-0.303	-0.241
nad1	0.535	0.605	0.488	0.473	0.02	-0.09	N/A	0.033	0.256	-0.007	0.128	N/A	-0.045	-0.154	-0.033	0.109	0.058	-0.114	-0.082	-0.175	-0.023	-0.006	-0.154	0.036	0.053	-0.176	0.045	-0.008	-0.083	0.511	0.25	0.311	0.236	0.218	0.304	-0.085	0.399	0.416	0.343
nad2	-0.444	-0.353	-0.587	-0.292	0.226	0.299	N/A	0.328	-0.064	0.311	0.043	-0.052	0.349	0.264	0.398	0.319	0.061	0.375	N/A	0.454	0.367	0.287	0.257	0.359	0.354	-0.178	0.261	0.252	0.204	-0.57	-0.22	-0.231	-0.322	-0.152	0.21	-0.14	-0.233	-0.489	-0.537
nad3	-0.434	-0.247	-0.433	-0.184	0.16	0.325	0.345	0.37	-0.138	0.402	0.127	0.163	0.311	0.258	0.223	0.325	0.173	0.186	0.22	0.321	0.293	0.299	0.258	0.38	0.383	0.44	0.058	0.256	-0.12	-0.524	-0.067	-0.098	-0.155	-0.151	0.136	-0.044	-0.118	-0.279	-0.255
nad4	0.62	0.554	0.575	0.416	-0.235	-0.248	-0.183	-0.187	0.147	-0.151	-0.051	0.059	-0.307	-0.176	-0.226	-0.215	N/A	-0.267	-0.263	-0.333	-0.195	-0.22	-0.17	-0.203	-0.185	-0.246	-0.137	-0.287	0.291	0.485	0.332	0.276	0.227	0.279	0.169	-0.029	0.382	0.369	0.41
nad4L	0.753	0.795	0.826	0.647	-0.118	-0.204	-0.129	-0.079	0.161	-0.197	0.022	0.27	-0.236	-0.125	-0.282	-0.145	-0.065	-0.143	-0.114	-0.273	-0.029	-0.014	-0.125	-0.119	-0.111	-0.205	0.019	0.019	0.326	0.636	0.191	0.146	0.356	0.195	0.4	0.418	0.449	0.516	0.49
nad5	-0.479	-0.418	-0.497	-0.419	0.334	0.246	0.42	0.398	-0.021	0.404	0.227	N/A	0.462	0.325	0.44	0.311	N/A	0.416	0.427	0.451	0.285	0.324	0.325	0.398	0.378	0.387	0.236	0.328	-0.127	0.396	0.219	0.172	0.222	0.213	0.086	-0.034	0.308	0.374	0.401
nad6	-0.737	-0.695	-0.791	-0.594	0.303	0.245	0.448	0.524	-0.198	0.421	0.224	0.017	0.392	0.376	0.487	N/A	0.281	0.295	0.258	0.5	0.385	0.377	0.376	0.468	0.456	0.594	0.225	0.241	-0.299	-0.629	-0.12	-0.303	-0.408	-0.243	-0.191	-0.289	-0.301	-0.535	-0.451
rRNAs	0.005	0.02	0.025	0.005	0.066	0.011	0.039	0.026	0.053	0.026	0.052	0.055	0.028	-0.007	0.017	0.053	0.014	0.015	0	0.01	0.043	0.026	0.002	0.024	0.047	0.071	-0.079	0.025	0.081	-0.147	0.003	0.051	0.047	0.035	-0.022	-0.047	-0.095	-0.069	0.052
rrnL	0.471	0.419	0.413	0.451	-0.065	-0.103	0.024	0.029	0.134	-0.137	0	0.087	-0.149	-0.029	-0.034	-0.186	N/A	N/A	N/A	N/A	N/A	0.021	0.03	0.012	0	-0.098	0.018	0.013	-0.127	0.447	0.189	0.23	0.271	0.212	0.297	0.189	0.377	0.41	0.388
rrnS	-0.126	-0.109	-0.197	-0.165	0.062	0.116	0.155	0.159	-0.126	0.092	-0.014	0.01	0.146	0.172	0.139	0.11	0.097	0.161	0.231	0.227	0.063	0.166	0.165	0.157	0.198	0.297	0.11	0.15	0.366	0.331	0.159	0.235	0.198	0.195	0.255	0.215	0.378	0.362	0.302
tRNAs	-0.014	-0.007	0.016	0.031	-0.013	-0.004	0.004	0.013	0.045	-0.007	0.003	-0.051	-0.01	0.073	0.008	-0.019	0.011	0.011	0.043	0.035	0.007	0.012	0.007	-0.026	-0.004	-0.012	-0.003	-0.007	0.034	0.031	0.011	0.02	0.028	0.009	0.056	0.02	0.029	-0.006	0.024
AT content
atp6	67	73.8	60.5	70.9	57.3	61.3	71.7	70.7	66.9	54.3	66.9	N/A	48.1	65.1	64.9	57.1	67.4	63.1	62.1	58.7	68.9	67.6	65	69.6	69.9	69.7	56.3	73.9	65.6	65.7	68.6	61.5	65.7	69.9	77.6	72.8	68.2	63.7	67.7
atp8	72.5	80.2	67.9	75.4	68.9	61.5	79.1	78.9	56.6	58.2	72.3	N/A	43	73.7	69.9	58.4	67.4	69.7	69.1	61.6	77	N/A	N/A	N/A	N/A	74.1	62.8	80.1	75	72.4	78.4	71.6	76.1	74.8	82.4	78	73.8	73.6	73
cox1	63.8	67.7	59	65.4	58.6	58.7	65.5	65.7	58.6	55.6	60.7	67	51.4	63.8	63.5	56.6	60.4	62.7	59.9	58.4	67	63.4	63.8	65.7	66.4	65.6	58.2	68.3	59.7	62.1	63.6	56.9	63.1	64.2	70.5	67	63.9	60.8	62.5
cox2	67.7	69.4	61.3	68.2	58.9	58.3	68.9	69	60.7	54.5	64.2	68.5	51.3	60.3	62.2	55.9	62.8	63.3	59.5	57.4	66.5	66	60.3	69.1	69	68.2	56.6	72.1	62.9	64.2	67.8	65.1	63.9	68.3	74.9	69.1	65.4	59.8	65.1
cox3	65.8	70.3	58.7	67.3	55.4	56.4	65.8	65.6	60.5	55.7	59	67.6	47.1	60.8	59.4	55	60.2	60.8	58.1	55.8	64.5	62	60.7	65.4	66.9	67.6	56.7	68.6	62.6	61.3	65.8	59.6	62.4	65	72	67.8	62.6	61.6	64.5
cytb	67	69.6	62.8	71.7	59.8	57.7	68.9	69.4	55.6	58.8	62	66.5	58.2	66.2	69.9	54.9	63.8	63.8	61.1	60.3	68.4	67.6	66.1	69	69.1	67.2	57.2	72.7	64.2	64.2	64.4	60.1	63.2	69.3	73.2	70	66.9	61.1	64.9
nad1	68.7	71.9	63.5	73.7	58.4	56.5	N/A	71.1	66.2	55.4	66.5	N/A	47.1	61	60.5	54.4	64.9	62.9	60.4	57.2	68.6	65.3	61	70.5	71.4	69.1	58.9	74	67	66.3	70.2	61.4	66.6	71.7	75.4	71.7	69.7	66.6	69.2
nad2	69.3	75.9	62.2	74.7	61.6	64.2	N/A	73.2	63.1	54.1	67.5	74.1	56.2	68.1	72	61.7	71	66.4	N/A	59.1	72.5	71.4	68.4	74.4	74.3	72.9	60.6	78.4	68.4	68.4	69.5	58.9	65.8	70.3	80.4	76.9	66.8	64.1	68.3
nad3	69.8	75.8	63.8	78.4	53.8	56.5	69.2	69.5	63.3	52.9	64.4	71.9	40.1	63.4	60.7	52.3	66.1	64.6	59.6	58.2	70.9	67.3	63.4	71.5	70.1	71	55.6	75.3	64.7	69.5	70.4	65.5	67.1	70.1	77.2	74.2	64.2	65.3	71.2
nad4	68.7	71.8	63.4	73.4	63	60	73.5	73.2	60.9	57.5	66.1	71.6	57	70	72.3	57.8	N/A	65.9	61.8	59.3	69	69.8	70.2	74.2	74.1	69.7	61	75.4	65.7	68.1	69.4	63.3	68.1	72.4	77.5	74.3	66.6	66.7	69.3
nad4L	73	74	66.3	77.1	64.9	63.6	77.7	77.4	63.1	55.1	68.1	75.1	59.8	74	73	62.6	72.1	69.3	69.7	72.4	77.1	73.3	74	77.1	77.4	70.7	63.6	81	68.7	70.7	68.7	65.7	71	74.4	82.8	72.5	66.7	68.4	67.7
nad5	66.4	72.4	63.3	71.5	61.8	61.9	73.7	73.5	54.8	57.1	64.1	N/A	59.7	71.6	71.7	61.3	N/A	66.7	65	63	70.4	70.3	71.6	74.1	74.1	69.7	60	76.7	64.7	70.1	69.9	64.5	67.4	72.5	77.5	72.3	68.3	66.2	69
nad6	71.8	74.9	66	73.2	64.2	69.7	72.9	74.5	63.1	55.1	69.6	76.4	60	73.8	76.8	N/A	67.7	73.7	70.2	64	75.8	73.8	73.8	73.8	73.1	71.2	57.8	82.3	69.2	69.7	75.3	66.3	72.5	73.2	81.1	76.3	71.3	69.2	71.5
rRNAs	71.8	75.5	67.6	77.6	63.1	62.5	69.7	72.7	67	55.7	68.7	70.3	55.4	68.4	67	60.2	65.1	62.3	69	60.2	63.6	67	67.7	69.6	68.8	72.6	60.3	75.5	70.9	70.5	73.9	68.9	70.9	77.3	79.3	76.2	71.8	69	73.6
rrnL	71.2	76	67.9	77.1	65.1	65.6	71.7	77.1	65.7	59	72.7	76.1	62.3	71.9	72.8	60.5	N/A	N/A	N/A	N/A	N/A	70.1	70.7	72.8	71.2	73.2	62.2	79.7	71.1	70.9	75.9	69.7	71.7	78	79.5	77.6	73.7	70.2	73.4
rrnS	72.9	74.7	67	78.4	60.2	57.8	68	67.2	69.3	50.5	62.2	62.6	43.1	64.1	60.2	59.7	65.1	62.3	69	60.2	63.6	64.3	65	66.7	67.1	71.7	56.6	68.5	70.3	69.7	70.6	67.6	69.4	75.6	79	75.1	68.8	66.6	73.9
tRNAs	71.8	75.4	70.3	76.4	65	65.1	75.3	76.6	69.3	57.2	67.8	76.7	62.8	69.4	68.9	63.6	69.4	71	69.3	65.7	72.2	71.5	69.7	71.9	76.2	71.8	65.6	75.5	72.6	68.7	71.6	68.5	65.2	68.8	78.9	74.9	66.7	68	71.2
GC content
atp6	32.9	26.2	39.5	29.1	42.7	38.8	28.3	29.3	33.2	45.7	33.1	N/A	51.9	35	35.1	42.9	32.5	36.9	38	41.3	31.1	32.4	35	30.4	30.1	30.3	43.8	26.1	34.4	34.3	31.4	38.5	34.2	30	22.4	27.3	31.9	36.3	32.3
atp8	27.4	19.7	32	24.5	31.1	38.5	20.9	21.2	43.4	41.8	27.7	N/A	57.1	26.3	30.2	41.6	32.7	30.3	30.9	38.4	23	N/A	N/A	N/A	N/A	25.9	37.2	19.9	25	27.5	21.5	28.3	23.9	25.1	17.6	22.1	26.3	26.4	27.1
cox1	36.2	32.4	41	34.5	41.4	41.3	34.5	34.3	41.4	44.4	39.3	33	48.6	36.2	36.6	43.5	39.6	37.2	40.2	41.7	33	36.5	36.2	34.3	33.7	34.3	41.9	31.7	40.3	37.9	36.4	43	36.9	35.8	29.5	32.9	36	39.3	37.6
cox2	32.3	30.7	38.7	31.8	41.1	41.6	31.2	31	39.2	45.4	35.8	31.6	48.8	39.7	37.7	44.1	37.2	36.6	40.3	42.6	33.5	33.9	39.7	30.8	31	31.8	43.4	27.8	37.1	35.8	32.1	34.9	36.1	31.7	25.1	31	34.6	40.2	34.9
cox3	34.2	29.7	41.2	32.7	44.6	42.8	34.2	34.4	39.6	44.2	40.9	32.3	52.8	39.2	40.6	45	39.8	39.1	41.8	44.2	35.4	38	39.3	34.6	33.1	32.4	43.3	31.4	37.4	38.7	34.1	40.4	37.6	34.9	28	32.2	37.4	38.4	35.5
cytb	33.1	30.4	37.2	28.3	40.1	42.3	31.1	30.6	44.5	41.3	38	33.5	41.8	33.8	30	45.1	36.2	36.3	38.9	39.7	31.6	32.5	33.9	30.9	30.9	32.8	42.7	27.4	35.7	35.7	35.7	39.8	36.8	30.7	26.8	30	33.1	38.8	35.1
nad1	31.4	28.1	36.4	26.3	41.6	43.5	N/A	28.9	33.8	44.5	33.5	N/A	52.8	39	39.5	45.6	35.2	37.2	39.6	42.9	31.3	34.8	39	29.5	28.6	31	41.1	26	33	33.8	29.8	38.6	33.5	28.4	24.5	28.2	30.3	33.5	30.8
nad2	30.7	24.1	37.7	25.2	38.5	35.7	N/A	26.8	36.9	45.9	32.4	25.9	43.9	31.8	27.9	38.2	29	33.6	N/A	41	27.5	28.6	31.6	25.6	25.7	27	39.3	21.6	31.6	31.6	30.5	41	34.2	29.7	19.6	23.1	33.2	35.9	31.7
nad3	30.2	24.2	36.2	21.6	46.2	43.5	30.8	30.5	36.7	47.1	35.6	28.2	59.9	36.6	39.3	47.7	33.8	35.4	40.5	41.8	29.1	32.7	36.6	28.3	29.9	29	44.4	24.7	35.3	30.4	29.6	34.4	32.9	29.9	22.9	25.9	35.9	34.7	28.8
nad4	31.3	28.2	36.7	26.7	37	40.1	26.4	26.8	39.1	42.5	33.9	28.5	43	30	27.7	42.2	N/A	34.1	38.2	40.7	31	30.2	29.8	25.8	25.8	30.3	39	24.6	34.3	31.9	30.6	36.7	31.8	27.5	22.4	25.7	33.4	33.3	30.7
nad4L	27	26	33.7	22.9	35.1	36.4	22.2	22.6	37	44.9	31.9	24.9	40.2	26	27.1	37.4	27.9	30.6	29.6	27.6	22.9	26.8	26	22.9	22.5	29.4	36.3	19	31.4	29.3	31.4	34.4	29	25.6	17.2	27.4	33.3	31.7	32.4
nad5	33.5	27.6	36.7	28.6	38.2	38.1	26.2	26.5	45.2	43	35.9	N/A	40.2	28.4	28.3	38.6	N/A	33.3	35	36.9	29.6	29.8	28.4	25.9	26	30.3	40	23.3	35.3	29.9	30.2	35.5	32.7	27.4	22.5	27.7	31.7	33.9	31
nad6	28.2	25	33.9	26.9	35.8	30.3	27.2	25.5	36.9	44.9	30.4	23.6	39.9	26.2	23.3	N/A	32.3	26.3	29.7	36	24.3	26.3	26.2	26.2	26.9	28.8	42.3	17.7	30.8	30.3	24.6	33.6	27.5	26.9	18.8	23.7	28.7	30.8	28.5
rRNAs	28.1	24.6	32.4	22.4	36.9	37.6	30.3	27.3	32.7	44.3	31.4	29.6	44.6	31.6	33	39.8	34.8	37.7	30.9	39.8	36.5	33	32.3	30.3	31.1	27.3	39.7	24.6	28	29.5	26	31.1	29.2	22.7	20.8	23.8	28.2	31	26.4
rrnL	28.7	24	32	22.9	34.9	34.5	28.3	22.9	34	41	27.4	23.9	37.7	28.1	27.3	39.6	N/A	N/A	N/A	N/A	N/A	29.9	29.3	27.1	28.8	26.8	37.9	20.2	28.2	29	24.1	30.3	28.3	22	20.5	22.4	26.3	29.8	26.5
rrnS	27	25.2	32.9	21.5	39.9	42.2	32	32.8	30.5	49.6	37.9	37.2	56.9	36	39.8	40.3	34.8	37.7	30.9	39.8	36.5	35.7	35	33.2	32.9	28.3	43.4	31.5	27.7	30.3	29.5	32.4	30.6	24.3	21	25	31.2	33.3	26.2
tRNAs	28.2	24.6	29.7	23.6	35	34.9	24.8	23.5	30.7	42.7	32.1	23.3	37.2	30.6	31.2	36.4	30.6	29	30.6	34.3	27.7	28.2	30.1	27.8	23.5	28.2	34.4	24.5	27.4	31.3	28.3	31.5	34.9	31.2	21.1	25.1	33.3	32	28.8
A_m: Asotana magnifica MK790137
I_b: Idotea baltica DQ442915.1
A_v_EF643519.3: Armadillidium vulgare EF643519.3
A_v_GU130251.1: Armadillidium vulgare GU130251.1
A_aq: Asellus aquaticus GU130252.1
E_pu: Eurydice pulchra GU130253.1
G_c: Glyptonotus cf. antarcticus FK-2009 GU130254.1
J_m: Janira maculosa GU130255.1
S_s: Sphaeroma serratum GU130256.1
T_r_KR013001.1: Trachelipus rathkii KR013001.1
C_c: Cylisticus convexus KR013002.1
B_s: Bathynomus sp. YS-2016 KU057374.1
O_a: Oniscus asellus KX289581.1
P_d_KX289582.1: Porcellio dilatatus dilatatus KX289582.1
P_d_KX289583.1: Porcellio dilatatus petiti KX289583.1
P_p: Porcellionides pruinosus KX289584.1
A_al: Armadillidium album KX289585.1
A_n: Armadillidium nasatum MF187611.1
T_r_MF187612.1: Trachelipus rathkii MF187612.1
A_v_MF187613.1: Armadillidium vulgare MF187613.1
A_v_MF187614.1: Armadillidium vulgare MF187614.1
T_c: Tachaea chinensis MF419232.1
I_j: Ichthyoxenos japonensis MF419233.1
C_i: Cymothoa indica MH396438.1
L_p: Limulus polyphemus NC_003057.1
S_m: Squilla mantis NC_006081.1
L_m: Lysiosquillina maculata NC_007443.1
L_o: Ligia oceanica NC_008412.1
P_v: Penaeus vannamei NC_009626.1
E_s: Eophreatoicus sp. 14 FK-2009 NC_013976.1
E_pa: Euphausia pacifica NC_016184.1
M_r: Metacrangonyx repens NC_019653.1
L_q: Limnoria quadripunctata NC_024054.1
N_j: Neomysis japonica NC_027510.1
E_c: Eulimnogammarus cyaneus NC_033360.1
T_m: Typhlatya miravetensis NC_036335.1
A_f: Atergatis floridus NC_037201.1
G_o: Gyge ovalis NC_037467.1
M_s: Mongoloniscus sinensis NC_039966.1
N/A: data not available

## Sheet: C
Phylogenetic analyses.
Bayesian inference results produced using a dataset with ten outgroups. Posterior probability values <1.0 are shown next to nodes.
Bayesian inference results produced using a dataset with one outgroup. Posterior probability values <1.0 are shown next to nodes.
Bayesian inference results produced using a dataset without an outgroup. Posterior probability values <1.0 are shown next to nodes.
Phylogenetic tree produced using the nuclear 18S gene dataset (shown below) and CAT-GTR algorithm.
18S dataset (and taxonomic overlap with the mitogenomic dataset)
Species in the mitogenomic dataset					Representatives in the 18S dataset
Species	Superorder	Order	Suborder	Family	Organism	Order	Suborder	Infraorder	Superfamily	Family	NOTE		ID
Eophreatoicus sp.			Phreatoicidea	Amphisopidae	Andhracoides shabuddin	Isopoda	Phreatoicidea	N/A	Phreatoicidea	Hypsimetopidae			KC771215.1
					Colubotelson thomsoni	Isopoda	Phreatoicidea	N/A	Phreatoicidea	Phreatoicidae			AF255703.1
					Eophreatoicus sp. 04	Isopoda	Phreatoicidea	N/A	Phreatoicidea	Phreatoicidae			KF260958.1
Armadillidium album			Oniscidea	Armadillidiidae	Spherillo grossus	Isopoda	Oniscidea	N/A	Oniscidea	Armadillidae			KC706327.1
Armadillidium nasatum			Oniscidea	Armadillidiidae	Spherillo grossus	Isopoda	Oniscidea	N/A	Oniscidea	Armadillidae			KC706330.1
Armadillidium vulgare			Oniscidea	Armadillidiidae	Spherillo grossus	Isopoda	Oniscidea	N/A	Oniscidea	Armadillidae			KC999648.1
Armadillidium vulgare			Oniscidea	Armadillidiidae
Asellus aquaticus			Asellota	Asellidae	Asellus aquaticus	Isopoda	Asellota	N/A	Aselloidea	Asellidae			AF255701.1
					Asellus aquaticus	Isopoda	Asellota	N/A	Aselloidea	Asellidae			AJ287055.1
					Lirceus fontinalis	Isopoda	Asellota	N/A	Aselloidea	Asellidae			AF255702.1
					Proasellus slavus	Isopoda	Asellota	N/A	Aselloidea	Asellidae			AF496662.1
Gyge ovalis			Cymothoida	Bopyridae	Allokepon sinensis	Isopoda	Cymothoida	Epicaridea	Bopyridoidea	Bopyridae	Parasites of crustaceans		KF765766.1
					Argeia pugettensis	Isopoda	Cymothoida	Epicaridea	Bopyridoidea	Bopyridae	Parasites of crustaceans		KF765770.1
					Athelges takanoshimensis	Isopoda	Cymothoida	Epicaridea	Bopyridoidea	Bopyridae	Parasites of crustaceans		KF765762.1
					Athelges takanoshimensis	Isopoda	Cymothoida	Epicaridea	Bopyridoidea	Bopyridae	Parasites of crustaceans		KF765769.1
					Athelges takanoshimensis	Isopoda	Cymothoida	Epicaridea	Bopyridoidea	Bopyridae	Parasites of crustaceans		KF765773.1
					Hemiarthrus abdominalis	Isopoda	Cymothoida	Epicaridea	Bopyridoidea	Bopyridae	Parasites of crustaceans		AF255684.1
					Phyllodurus abdominalis	Isopoda	Cymothoida	Epicaridea	Bopyridoidea	Bopyridae	Parasites of crustaceans		KF765765.1
					Probopyrus buitendijki	Isopoda	Cymothoida	Epicaridea	Bopyridoidea	Bopyridae	Parasites of crustaceans		KF765767.1
					Probopyrus pacificiensis	Isopoda	Cymothoida	Epicaridea	Bopyridoidea	Bopyridae	Parasites of crustaceans		AF255683.1
					Probopyrus pandalicola	Isopoda	Cymothoida	Epicaridea	Bopyridoidea	Bopyridae	Parasites of crustaceans		EU848422.1
					Pseudione longicauda	Isopoda	Cymothoida	Epicaridea	Bopyridoidea	Bopyridae	Parasites of crustaceans		KF765760.1
					Pseudione longicauda	Isopoda	Cymothoida	Epicaridea	Bopyridoidea	Bopyridae	Parasites of crustaceans		KF765774.1
Glyptonotus cf. antarcticus			Valvifera	Chaetiliidae	Glyptonotus antarcticus	Isopoda	Valvifera	N/A		Chaetiliidae			AF255696.1
Bathynomus sp.			Cymothoida	Cirolanidae	Cirolana kokoru	Isopoda	Cymothoida	N/A	Cymothooidea	Cirolanidae	free_living		JF699513.1
Eurydice pulchra			Cymothoida	Cirolanidae	Eurydice pulchra	Isopoda	Cymothoida	N/A	Cymothooidea	Cirolanidae	free_living		AF255690.1
					Lucayalana troglexuma	Isopoda	Cymothoida	N/A	Cymothooidea	Cirolanidae	free_living		KY426830.1
					Typhlocirolana moraguesi	Isopoda	Cymothoida	N/A	Cymothooidea	Cirolanidae	free_living		AF255692.1
Asotana magnifica			Cymothoida	Cymothoidae									MK079664
Cymothoa indica			Cymothoida	Cymothoidae									MK542857
Ichthyoxenos japonensis			Cymothoida	Cymothoidae									MK542856
Tachaea chinensis			Cymothoida	Corallanidae									MK542858
					Anilocra physodes	Isopoda	Cymothoida	N/A	Cymothooidea	Cymothoidae	Fish parasite (body surface)		AF255686.1
					Riggia paranensis	Isopoda	Cymothoida	N/A	Cymothooidea	Cymothoidae	Freshwater fish parasite (burrowing)		AF255685.1
					Excorallana quadricornis	Isopoda	Cymothoida	N/A	Cymothooidea	Corallanidae	free_living		AF255688.1
					Zonophryxus dodecapus	Isopoda	Cymothoida	Epicaridea	Cryptoniscoidea	Dajidae	shrimp ectoparasite		KF765768.1
					Zonophryxus quinquedens	Isopoda	Cymothoida	Epicaridea	Cryptoniscoidea	Dajidae	shrimp ectoparasite		DQ008451.1
Idotea baltica			Valvifera	Idoteidae	Erichsonella attenuata	Isopoda	Valvifera	N/A	N/A	Idoteidae			AY743948.1
					Idotea baltica	Isopoda	Valvifera	N/A	N/A	Idoteidae			AJ011390.1
Ligia oceanica			Oniscidea	Ligiidae	Ligia oceanica	Isopoda	Oniscidea	N/A	Oniscidea	Ligiidae			AF255698.1
					Ligidium hypnorum	Isopoda	Oniscidea	N/A	Oniscidea	Ligiidae			AJ287056.1
Limnoria quadripunctata			Limnoriidea	Limnoriidae	Limnoria quadripunctata	Isopoda	N/A	N/A		Limnoriidae			AF279599.1
Porcellio dilatatus dilatatus			Oniscidea	Porcellionidae
Porcellionides pruinosus			Oniscidea	Porcellionidae
Sphaeroma serratum			Sphaeromatidea	Sphaeromatidae	Sphaeroma serratum	Isopoda	Sphaeromatidea	N/A		Sphaeromatidae			AF255694.1
					Sphaeroma serratum	Isopoda	Sphaeromatidea	N/A		Sphaeromatidae			JF699594.1
Trachelipus rathkii			Oniscidea	Trachelipodidae	Porcellium conspersum	Isopoda	Oniscidea	N/A	Oniscidea	Trachelipodidae			JN232933.1
Outgroups
Species	Superorder	Order	Suborder	Family	Organism	Order	Suborder	Infraorder	Superfamily	Family	NOTE		ID
Euphausia pacifica	Eucarida	Euphausiacea		Euphausiidae	Euphausia pacifica	N/A	N/A	N/A	Eucarida	Euphausiidae			AY141010.1
Limulus polyphemus		Xiphosurida		Limulidae	Limulus polyphemus	N/A	N/A	N/A	N/A	Limulidae			U91490.1
Lysiosquillina maculata	Hoplocarida	Stomatopoda	Unipeltata	Lysiosquillidae	Lysiosquillina maculata	N/A	N/A	N/A	Hoplocarida	Lysiosquillidae			HM138878.1
Squilla mantis	Hoplocarida	Stomatopoda	Unipeltata	Squillidae	Squilla mantis	N/A	N/A	N/A	Hoplocarida	Squillidae			GQ328958.1
Neomysis japonica	Peracarida	Mysida		Mysidae	Neomysis americana	N/A	N/A	N/A	Mysida	Mysidae			HM179998.1
Eulimnogammarus cyaneus	Peracarida	Amphipoda	Senticaudata	Eulimnogammaridae	Protella gracilis	Amphipoda	Senticaudata	Corophiida	Caprelloidea	Caprellidae			AB295396.1
Metacrangonyx repens	Peracarida	Amphipoda	Senticaudata	Metacrangonyctidae	Gammarus troglophilus	Amphipoda	Senticaudata	Gammarida	Gammaroidea	Gammaridae			AF202983.1
					Arrhis phyllonyx	Amphipoda	Amphilochidea	Amphilochida	Oedicerotoidea	Oedicerotidae			AF419235.1
					Hyperietta stephenseni	Amphipoda	Hyperiidea	Physocephalata	Phronimoidea	Lestrigonidae			DQ378051.1
Typhlatya miravetensis	Eucarida	Decapoda	Pleocyemata	Atyidae	Typhlatya mitchelli	N/A	N/A	N/A	Atyoidea	Atyidae			EU868735.1
Atergatis floridus	Eucarida	Decapoda	Pleocyemata	Xanthidae	Atergatis laevigatus	N/A	N/A	N/A	Xanthoidea	Xanthidae			HM637986.1
Litopenaeus vannamei	Eucarida	Decapoda	Dendrobranchiata	Penaeidae	Litopenaeus vannamei	N/A	N/A	N/A	Penaeoidea	Penaeidae			EU920969.1

## Sheet: D
Skews and base composition of the mitogenome of A. magnifica.
Majority strand is designated as + (plus), and minority as - (minus). ‘codon’ and ‘PCGs’ values were calculated for concatenated PCGs (protein-coding genes) encoded on the same strand.
Region	Strand	AT skew	GC skew	AT(%)	GC(%)	T	C	A	G	Size(bp)
Genome	+	0.111	-0.423	68.3	31.6	30.3	22.5	38	9.1	14435
PCGs	+	0.018	-0.39	67	33	32.9	22.9	34.1	10.1	7332
PCGs	-	-0.326	0.546	68.5	31.4	45.4	7.1	23.1	24.3	3657
1st codon	+	0.139	-0.122	63.8	36.2	27.5	20.3	36.3	15.9	2444
1st codon	-	-0.178	0.547	62.7	37.3	36.9	8.4	25.8	28.9	1219
2nd codon	+	-0.396	-0.383	63.6	36.5	44.4	25.2	19.2	11.3	2444
2nd codon	-	-0.469	0.323	68.2	31.7	50.1	10.7	18.1	21	1219
3rd codon	+	0.269	-0.769	73.8	26.2	27	23.2	46.8	3	2444
3rd codon	-	-0.321	0.825	74.6	25.3	49.3	2.2	25.3	23.1	1219
tRNAs	+	0.075	-0.125	70.9	29.2	32.8	16.4	38.1	12.8	549
tRNAs	-	-0.073	0.427	72.7	27.2	39	7.8	33.7	19.4	525
rrnL	-	-0.087	0.471	71.2	28.7	38.7	7.6	32.5	21.1	1079
rrnS	+	0.145	-0.126	72.9	27	31.2	15.2	41.7	11.8	703
atp6	+	0.016	-0.482	67	32.9	33	24.4	34	8.5	667
atp8	+	-0.009	-0.619	72.5	27.4	36.6	22.2	35.9	5.2	153
cox1	+	-0.009	-0.2	63.8	36.2	32.2	21.7	31.6	14.5	1536
cox2	+	0.115	-0.324	67.7	32.3	29.9	21.4	37.8	10.9	678
cox3	+	-0.01	-0.279	65.8	34.2	33.2	21.9	32.6	12.3	786
cytb	-	-0.326	0.414	67	33.1	44.4	9.7	22.6	23.4	1126
nad1	-	-0.341	0.554	68.8	31.1	46.1	6.9	22.7	24.2	921
nad2	+	-0.047	-0.444	69.3	30.7	36.3	22.2	33	8.5	984
nad3	+	0.02	-0.434	69.8	30.2	34.2	21.7	35.6	8.5	351
nad4	-	-0.313	0.62	68.7	31.3	45.1	5.9	23.6	25.4	1311
